# Supplementary material
Source: MDPI journal article supplement (https://www.mdpi.com/2073-4441/16/4/533)
Supplement: s1 [file s1]

Supplementary material for “The reintroduction of brown trout (*Salmo trutta* fario) in the Upper Scheldt River basin (Flanders, Belgium): success or failure?”

Table S1 – Overview of the different sites where the *in situ* experiments took place in the different years. X and Y coordinates are given in Belge Lambert 72.

| Site | Watercourse    | Description       | City     | X      | Y      | 2019-<br>2020 | 2020-<br>2021 | 2021-<br>2022 |
|------|----------------|-------------------|----------|--------|--------|---------------|---------------|---------------|
| 1    | Molenbeek      | Van Temsche Molen | Zottegem | 107349 | 173869 |               | x             | x             |
| 2    | Zwalmolen      | Rekegemstraat     | Zwalm    | 105872 | 174468 | x             | x             |               |
| 3    | Zwalmbeek      | Brusselsestraat   | Brakel   | 108050 | 166437 |               | x             | x             |
| 4    | Zwalm          | Boembekemolen     | Brakel   | 107352 | 170718 | x             |               |               |
| 5    | Zwalm          | Kasteeldreef      | Brakel   | 108099 | 168300 | x             |               |               |
| 6    | Zwalm          | Berendries        | Brakel   | 107735 | 169163 | x             |               |               |
| 7    | Dorenbosbeek   | Lange haag        | Brakel   | 105805 | 162942 | x             |               |               |
| 8    | Molenbeek      | Hondenbos         | Zottegem | 109078 | 174315 |               |               | x             |
| 9    | Peerdestokbeek | Pottenberg        | Brakel   | 103913 | 169354 |               |               | x             |
| 10   | Roosmeerbeek   | Riebeke           | Brakel   | 105903 | 165489 |               |               | x             |

Figure S1 –Location of the experimental sites and the erosion potential of the surrounding areas. Information retrieved from Databank Ondergrond Vlaanderen (DOV) (<https://www.dov.vlaanderen.be/>).

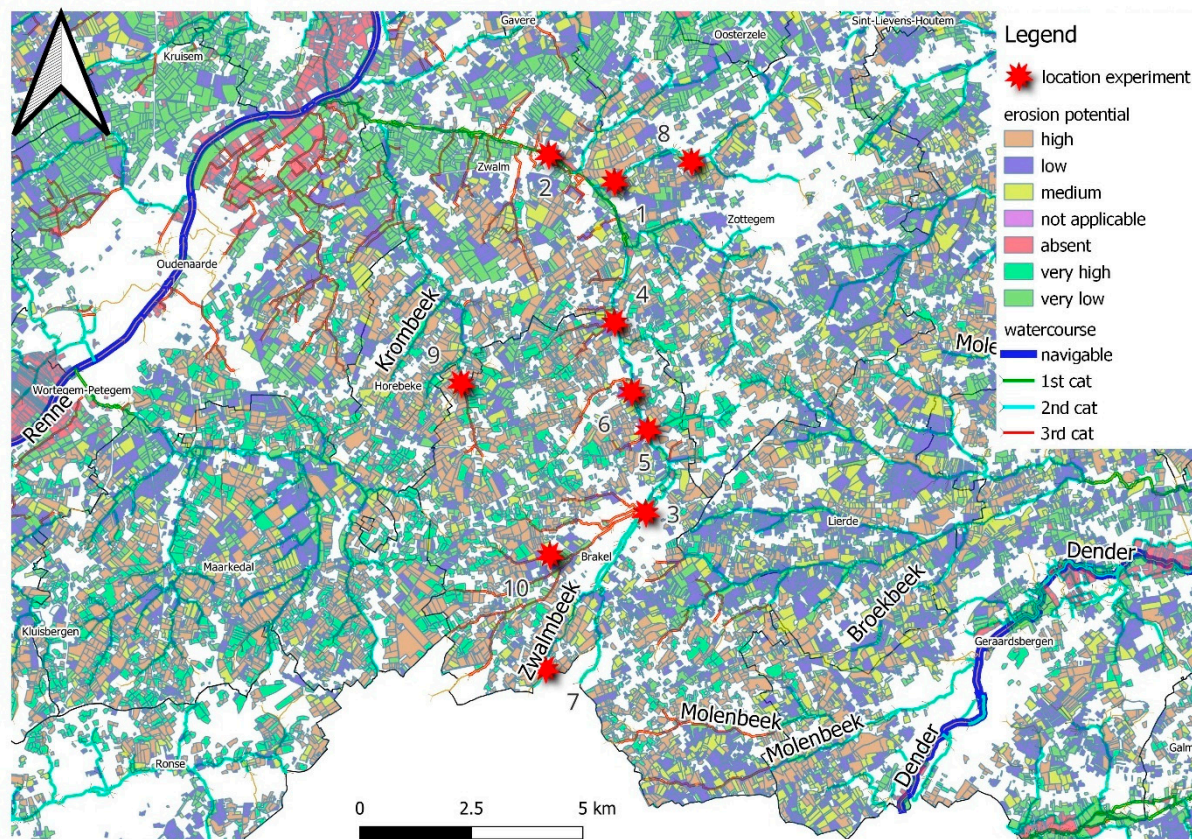

Table S2- Average values of the different environmental and biotic variables that were linked to the specific research sites. BBI: Belgian biotic index, EC20: conductivity, O2%: percentage oxygen saturation. NA: no data available.

| Site | x      | y      | year | erosion<br>class | suspended<br>solids (mg/l) | Prati_O2 | BBI | Water<br>temperature<br>(°C) | pH  | EC20<br>(µS/cm) | O2% |
|------|--------|--------|------|------------------|----------------------------|----------|-----|------------------------------|-----|-----------------|-----|
| 1    | 107349 | 173869 | 2020 | high             | 23                         | 0.6      | 8   | 5.2                          | 8   | 804             | 92  |
| 1    | 107349 | 173869 | 2021 | high             | 20.45                      | 0.6      | 8   | 8.8                          | 8   | 748             | 95  |
| 2    | 105872 | 174468 | 2020 | very low         | 13.8                       | 2.73     | 7   | 6.2                          | 7.8 | 795             | 77  |
| 2    | 105872 | 174468 | 2019 | very low         | 13.5                       | 2.84     | 7   | 5.8                          | 7.7 | 808             | 64  |
| 3    | 108050 | 166437 | 2020 | very low         | 19.3                       | 2.96     | 7   | 5.8                          | 7.8 | 703             | 84  |
| 3    | 108050 | 166437 | 2021 | very low         | 27.5                       | 1.99     | 7   | 8.4                          | 7.8 | 561             | 88  |
| 4    | 107352 | 170718 | 2019 | high             | 173                        | 2.04     | 7   | 5.4                          | 7.8 | 753             | 66  |
| 5    | 108099 | 168300 | 2019 | high             | 42.7                       | 2.4      | 7   | 5.6                          | 7.8 | 769             | 77  |
| 6    | 107735 | 169163 | 2019 | high             | NA                         | NA       | NA  | 6                            | 7.8 | 776             | 77  |
| 7    | 105805 | 162942 | 2019 | high             | 18                         | 1.07     | 10  | 5.3                          | 7.7 | 603             | 86  |
| 8    | 109078 | 174315 | 2021 | medium           | 35.43                      | 1.79     | NA  | 8.7                          | 7.8 | 725             | 87  |
| 9    | 103913 | 169354 | 2021 | high             | 16.37                      | 1.17     | NA  | 9                            | 7.9 | 770             | 89  |
| 10   | 105903 | 165489 | 2021 | low              | 55.72                      | 0.56     | NA  | 8.8                          | 7.7 | 595             | 93  |

Table S3 – Detailed statistics of the post-hoc multiple comparisons based on Wilcoxon's test.

| Erosion classes | W-statistic | P-value |
|-----------------|-------------|---------|
| high-low        | 40.5        | 0.147   |
| high-medium     | 10.5        | 0.093   |
| high very low   | 53.5        | 0.018   |
| low-medium      | 0.0         | 0.064   |
| low-very low    | 4.5         | 0.053   |
| medium-very low | 14.5        | 0.664   |

Table S4 – Output of the linear regression model including, conductivity (EC20), suspended solids, Basic Prati index and erosion classes.

|                                    | Estimate | Std.<br>Error | t-value | p-value  |
|------------------------------------|----------|---------------|---------|----------|
| (Intercept)                        | 252.2268 | 44.36663      | 5.685   | 7.43E-06 |
| data_eggs\$basis.Pratibad          | -9.83426 | 5.97463       | -1.646  | 0.1128   |
| data_eggs\$basis.Pratigood         | -45.7936 | 10.70288      | -4.279  | 0.00026  |
| data_eggs\$basis.Pratiunsufficient | 18.46835 | 12.4917       | 1.478   | 0.15229  |
| data_eggs\$landbouwlow             | -15.329  | 6.99518       | -2.191  | 0.03837  |
| data_eggs\$landbouwmedium          | -16.3684 | 5.87773       | -2.785  | 0.01029  |
| data_eggs\$landbouwvery low        | -5.57019 | 10.16419      | -0.548  | 0.58874  |
| data_eggs\$EC20                    | -0.32263 | 0.05748       | -5.613  | 8.90E-06 |
| data_eggs\$suspended solids        | 0.01541  | 0.05392       | 0.286   | 0.77748  |

Residual standard error: 8.273 on 24 degrees of freedom

Multiple R-squared: 0.8771, Adjusted R-squared: 0.8361

F-statistic: 21.41 on 8 and 24 DF, p-value: 3.764e-09
